# Supplementary material
Source: HighWire-hosted journal article supplement (http://www.qdcxjkg.com/highwire/filestream/113243/field_highwire_adjunct_files/3/Online_supplement_figure_1.pdf)
Supplement: Online_supplement_figure_1.pdf [file Online_supplement_figure_1.pdf]

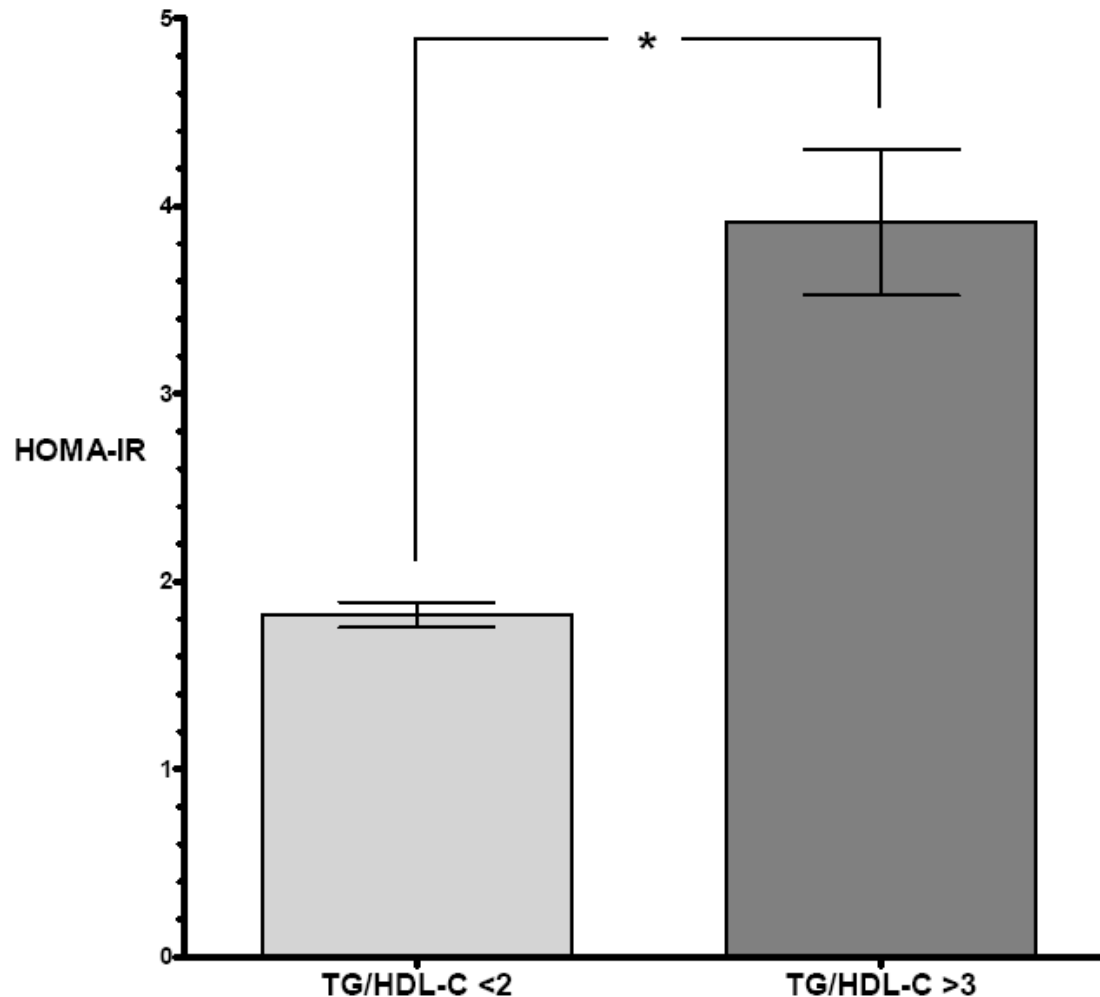

**FIGURE S1.** Determination of Insulin Resistance by TG/HDL-C is validated by HOMA-IR calculation in NHANES females. Assessment of insulin resistance by the homeostasis model (HOMA-IR) shows a significantly lower value (\*  $p < 0.0001$ ) in subjects deemed insulin sensitive by TG/HDL-C ratio  $< 2$  than those with TG/HDL-C  $> 3$ . HOMA-IR for TG/HDL  $< 2 = 1.82 \pm 0.067$  ( $n = 559$ ) and for TG/HDL  $> 3 = 3.91 \pm 0.39$  ( $n = 208$ ); values indicate Mean  $\pm$  SEM. HOMA-IR = fasting glucose (mmol/l) x fasting insulin [ $\mu\text{U/ml}$ ]/22.5). TG/HDL-C = Triglyceride (TG) to high-density lipoprotein cholesterol (HDL-C) ratio.
